# Supplementary material for: Transferability of machine-learning-based global calibration models for NO 2 and NO low-cost sensors
Source: Copernicus journal article supplement (doi:10.5194/amt-17-3917-2024), 2024-07-03
Supplement: Supplementary file 1 [file amt-17-3917-2024-supplement.pdf]

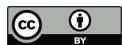

*Supplement of*

## **Transferability of machine-learning-based global calibration models for NO<sub>2</sub> and NO low-cost sensors**

**Ayah Abu-Hani et al.**

*Correspondence to:* Jia Chen ([jia.chen@tum.de](mailto:jia.chen@tum.de))

The copyright of individual parts of the supplement might differ from the article licence.

**Table S1.** Results of NO<sub>2</sub> and NO global models performance, for Case A (10 min measurements).

| Training set | Testing set  | NO <sub>2</sub> |                |            |           |                | NO         |           |                |            |           |                |            |           |                |            |           |                |            |
|--------------|--------------|-----------------|----------------|------------|-----------|----------------|------------|-----------|----------------|------------|-----------|----------------|------------|-----------|----------------|------------|-----------|----------------|------------|
|              |              | MLR             |                |            | SVR       |                | RF         |           |                | MLR        |           | SVR            |            |           | RF             |            |           |                |            |
| Primary SU   | Secondary SU | MAE (ppb)       | R <sup>2</sup> | RMSE (ppb) | MAE (ppb) | R <sup>2</sup> | RMSE (ppb) | MAE (ppb) | R <sup>2</sup> | RMSE (ppb) | MAE (ppb) | R <sup>2</sup> | RMSE (ppb) | MAE (ppb) | R <sup>2</sup> | RMSE (ppb) | MAE (ppb) | R <sup>2</sup> | RMSE (ppb) |
| SU009_HAE    | SU010_HAE    | 4.8             | 0.70           | 6.0        | 3.5       | 0.80           | 4.8        | 2.9       | 0.87           | 4.0        | 8.1       | 0.69           | 9.7        | 3.3       | 0.92           | 4.9        | 3.2       | 0.92           | 4.9        |
|              | SU011_HAE    | 16.5            | -2.62          | 21.5       | 2.8       | 0.87           | 4.1        | 2.3       | 0.92           | 3.3        | 9.0       | 0.63           | 11.1       | 2.3       | 0.96           | 3.5        | 1.7       | 0.98           | 2.7        |
|              | SU012_HAE    | 5.1             | 0.58           | 7.4        | 2.3       | 0.93           | 3.1        | 2.1       | 0.93           | 3.0        | 14.7      | 0.08           | 17.7       | 2.5       | 0.96           | 3.5        | 2.1       | 0.97           | 3.2        |
| SU010_HAE    | SU009_HAE    | 4.5             | 0.65           | 6.7        | 3.5       | 0.80           | 5.1        | 3.7       | 0.80           | 5.1        | 7.3       | 0.70           | 10.0       | 3.4       | 0.92           | 5.4        | 3.2       | 0.95           | 4.3        |
|              | SU011_HAE    | 9.4             | -0.29          | 12.8       | 2.9       | 0.88           | 3.9        | 2.9       | 0.87           | 4.0        | 5.3       | 0.85           | 7.1        | 3.2       | 0.93           | 5.0        | 2.9       | 0.95           | 4.0        |
|              | SU012_HAE    | 4.2             | 0.70           | 6.2        | 2.8       | 0.88           | 3.8        | 3.0       | 0.86           | 4.2        | 9.8       | 0.57           | 12.1       | 2.9       | 0.94           | 4.5        | 2.4       | 0.96           | 3.6        |
| SU011_HAE    | SU009_HAE    | 8.1             | 0.23           | 9.9        | 2.9       | 0.87           | 4.0        | 2.6       | 0.89           | 3.8        | 6.4       | 0.75           | 9.3        | 2.0       | 0.97           | 3.0        | 1.8       | 0.98           | 2.9        |
|              | SU010_HAE    | 8.7             | 0.04           | 10.6       | 4.0       | 0.60           | 6.8        | 3.3       | 0.81           | 4.8        | 5.8       | 0.82           | 7.4        | 3.3       | 0.92           | 4.8        | 3.7       | 0.90           | 5.5        |
|              | SU012_HAE    | 7.5             | 0.34           | 9.2        | 2.8       | 0.86           | 4.2        | 2.2       | 0.92           | 3.3        | 6.8       | 0.80           | 8.2        | 2.1       | 0.97           | 3.1        | 2.2       | 0.96           | 3.5        |
| SU012_HAE    | SU009_HAE    | 4.8             | 0.67           | 6.5        | 3.5       | 0.84           | 4.5        | 2.4       | 0.91           | 3.4        | 11.0      | 0.36           | 14.7       | 4.7       | 0.90           | 5.9        | 2.1       | 0.97           | 3.2        |
|              | SU010_HAE    | 4.6             | 0.72           | 5.8        | 3.6       | 0.74           | 5.6        | 2.9       | 0.87           | 4.0        | 6.7       | 0.73           | 9.1        | 3.8       | 0.91           | 5.3        | 2.7       | 0.95           | 3.9        |
|              | SU011_HAE    | 7.6             | 0.13           | 10.6       | 4.2       | 0.80           | 5.1        | 2.0       | 0.94           | 2.7        | 6.2       | 0.81           | 8.0        | 5.5       | 0.85           | 7.1        | 1.9       | 0.98           | 2.8        |
| SU009_ZUE    | SU010_ZUE    | 3.4             | 0.77           | 4.2        | 3.0       | 0.81           | 3.8        | 3.1       | 0.79           | 4.0        | 5.7       | 0.77           | 6.7        | 2.0       | 0.95           | 3.1        | 1.7       | 0.96           | 2.7        |
| SU010_ZUE    | SU009_ZUE    | 4.1             | 0.65           | 5.1        | 3.7       | 0.72           | 4.6        | 3.4       | 0.74           | 4.4        | 4.2       | 0.80           | 6.3        | 1.8       | 0.96           | 3.0        | 1.1       | 0.98           | 1.9        |
| SU011_LAU    | SU012_LAU    | 7.4             | 0.21           | 9.1        | 3.2       | 0.84           | 4.1        | 2.0       | 0.92           | 2.8        | 6.1       | 0.73           | 7.4        | 3.0       | 0.91           | 4.2        | 1.7       | 0.96           | 2.9        |
| SU012_LAU    | SU011_LAU    | 4.0             | 0.71           | 5.5        | 7.7       | 0.19           | 9.3        | 2.2       | 0.92           | 2.9        | 4.6       | 0.78           | 6.7        | 5.3       | 0.82           | 6.1        | 2.1       | 0.96           | 3.0        |

**Table S2.** Results of NO<sub>2</sub> and NO global models performance, for Case B (10 min measurements).

| Training set | Testing set  | NO <sub>2</sub> |                |            |           |                | NO         |           |                |            |           |                |            |           |                |            |           |                |            |
|--------------|--------------|-----------------|----------------|------------|-----------|----------------|------------|-----------|----------------|------------|-----------|----------------|------------|-----------|----------------|------------|-----------|----------------|------------|
|              |              | MLR             |                |            | SVR       |                | RF         |           |                | MLR        |           | SVR            |            |           | RF             |            |           |                |            |
| Primary SU   | Secondary SU | MAE (ppb)       | R <sup>2</sup> | RMSE (ppb) | MAE (ppb) | R <sup>2</sup> | RMSE (ppb) | MAE (ppb) | R <sup>2</sup> | RMSE (ppb) | MAE (ppb) | R <sup>2</sup> | RMSE (ppb) | MAE (ppb) | R <sup>2</sup> | RMSE (ppb) | MAE (ppb) | R <sup>2</sup> | RMSE (ppb) |
| SU009_HAE    | SU010_ZUE    | 6.1             | 0.20           | 7.8        | 5.4       | 0.30           | 7.3        | 5.1       | 0.33           | 7.1        | 7.9       | 0.49           | 10.0       | 4.9       | 0.64           | 8.4        | 4.9       | 0.62           | 8.6        |
|              | SU011_LAU    | 14.8            | -2.77          | 20.0       | 7.1       | 0.22           | 9.1        | 5.5       | 0.56           | 6.8        | 8.2       | 0.43           | 10.8       | 4.9       | 0.75           | 7.1        | 4.0       | 0.83           | 5.9        |
|              | SU012_LAU    | 6.6             | 0.13           | 9.6        | 7.1       | 0.28           | 8.7        | 5.7       | 0.54           | 7.0        | 17.3      | -1.33          | 21.8       | 4.8       | 0.76           | 7.0        | 3.9       | 0.83           | 6.0        |
| SU010_HAE    | SU009_ZUE    | 4.6             | 0.53           | 6.0        | 4.7       | 0.50           | 6.2        | 4.2       | 0.61           | 5.4        | 10.4      | -0.25          | 15.8       | 4.1       | 0.74           | 7.2        | 4.1       | 0.75           | 7.0        |
|              | SU011_LAU    | 8.2             | -0.32          | 11.8       | 5.9       | 0.52           | 7.1        | 4.3       | 0.73           | 5.4        | 6.5       | 0.59           | 9.2        | 3.7       | 0.82           | 6.1        | 3.5       | 0.87           | 5.2        |
|              | SU012_LAU    | 4.9             | 0.58           | 6.7        | 6.4       | 0.45           | 7.6        | 4.8       | 0.68           | 5.8        | 13.5      | -0.51          | 17.6       | 4.5       | 0.76           | 7.0        | 3.7       | 0.86           | 5.4        |
| SU011_HAE    | SU009_ZUE    | 9.7             | -0.76          | 11.5       | 3.7       | 0.67           | 5.0        | 4.0       | 0.62           | 5.4        | 8.8       | 0.07           | 13.6       | 3.4       | 0.80           | 6.3        | 4.0       | 0.73           | 7.3        |
|              | SU010_ZUE    | 10.3            | -1.07          | 12.5       | 3.5       | 0.72           | 4.6        | 4.1       | 0.61           | 5.4        | 6.5       | 0.49           | 10.1       | 3.7       | 0.79           | 6.4        | 4.8       | 0.65           | 8.3        |
|              | SU012_LAU    | 8.4             | -0.05          | 10.5       | 5.9       | 0.52           | 7.1        | 4.5       | 0.70           | 5.6        | 10.0      | 0.22           | 12.6       | 3.9       | 0.85           | 5.5        | 3.5       | 0.85           | 5.4        |
| SU012_HAE    | SU009_ZUE    | 5.5             | 0.35           | 7.0        | 5.3       | 0.42           | 6.6        | 4.5       | 0.50           | 6.2        | 13.3      | -0.71          | 18.4       | 4.9       | 0.74           | 7.2        | 3.6       | 0.76           | 6.9        |
|              | SU010_ZUE    | 5.8             | 0.32           | 7.2        | 4.0       | 0.57           | 5.7        | 4.7       | 0.34           | 7.1        | 8.5       | 0.22           | 12.5       | 4.5       | 0.71           | 7.6        | 4.1       | 0.75           | 7.1        |
|              | SU011_LAU    | 7.5             | 0.20           | 10.7       | 4.3       | 0.72           | 5.4        | 4.2       | 0.74           | 5.2        | 15.7      | -0.82          | 19.3       | 4.3       | 0.72           | 5.4        | 4.6       | 0.82           | 6.0        |
| SU009_ZUE    | SU010_HAE    | 4.7             | 0.66           | 6.4        | 6.5       | 0.39           | 8.5        | 4.9       | 0.58           | 7.1        | 9.1       | 0.44           | 13.1       | 6.5       | 0.39           | 8.5        | 4.8       | 0.78           | 8.1        |
|              | SU011_HAE    | 14.8            | -1.85          | 19.1       | 3.2       | 0.85           | 4.3        | 3.7       | 0.80           | 5.0        | 11.4      | 0.28           | 15.6       | 3.2       | 0.85           | 4.3        | 4.4       | 0.82           | 7.8        |
|              | SU012_HAE    | 6.3             | 0.40           | 8.8        | 5.0       | 0.67           | 6.5        | 3.9       | 0.76           | 5.5        | 15.2      | -0.12          | 19.4       | 5.0       | 0.67           | 6.5        | 4.3       | 0.83           | 7.7        |
|              | SU011_LAU    | 13.6            | -2.13          | 18.2       | 4.7       | 0.69           | 5.7        | 4.1       | 0.75           | 5.1        | 8.8       | 0.42           | 10.9       | 4.7       | 0.69           | 5.7        | 4.5       | 0.82           | 6.1        |
|              | SU012_LAU    | 7.5             | -0.09          | 10.7       | 4.3       | 0.72           | 5.4        | 4.2       | 0.74           | 5.2        | 15.7      | -0.82          | 19.3       | 4.3       | 0.72           | 5.4        | 4.6       | 0.82           | 6.0        |
| SU010_ZUE    | SU009_HAE    | 5.5             | 0.50           | 8.0        | 5.2       | 0.59           | 7.3        | 5.2       | 0.59           | 7.3        | 6.1       | 0.73           | 9.6        | 5.2       | 0.59           | 7.3        | 4.7       | 0.82           | 7.7        |
|              | SU011_HAE    | 11.5            | -0.82          | 15.2       | 3.5       | 0.80           | 5.1        | 4.3       | 0.73           | 5.4        | 5.8       | 0.71           | 9.3        | 3.5       | 0.80           | 5.1        | 4.4       | 0.83           | 7.5        |
|              | SU012_HAE    | 5.8             | -0.46          | 8.3        | 5.0       | 0.60           | 7.1        | 4.6       | 0.67           | 6.5        | 8.9       | 0.55           | 12.3       | 5.0       | 0.60           | 7.1        | 4.1       | 0.85           | 7.0        |
|              | SU011_LAU    | 10.6            | -0.98          | 14.5       | 4.5       | 0.72           | 5.5        | 4.3       | 0.73           | 5.4        | 5.8       | 0.73           | 7.5        | 4.5       | 0.72           | 5.5        | 4.5       | 0.82           | 6.1        |
| SU011_LAU    | SU012_LAU    | 6.6             | 0.20           | 9.2        | 4.6       | 0.72           | 5.4        | 4.2       | 0.75           | 5.2        | 10.1      | 0.24           | 12.5       | 4.6       | 0.72           | 5.4        | 4.3       | 0.84           | 5.7        |
|              | SU009_HAE    | 9.1             | 0.02           | 11.2       | 5.9       | 0.61           | 7.1        | 5.8       | 0.61           | 7          | 6.4       | 0.77           | 8.7        | 5.9       | 0.61           | 7.1        | 4.5       | 0.88           | 6.3        |
|              | SU010_HAE    | 9.6             | -0.17          | 11.7       | 7.6       | 0.3            | 9.1        | 6.2       | 0.51           | 7.6        | 6.2       | 0.76           | 8.5        | 7.6       | 0.3            | 9.1        | 5.1       | 0.83           | 7.2        |
|              | SU012_HAE    | 8.5             | 0.10           | 10.7       | 7.3       | 0.4            | 8.8        | 5.7       | 0.62           | 7          | 6.3       | 0.78           | 8.6        | 7.3       | 0.4            | 8.8        | 4.4       | 0.89           | 6.2        |
|              | SU009_ZUE    | 5.9             | 0.32           | 7.1        | 7.4       | -0.05          | 8.9        | 5.2       | 0.50           | 6.2        | 8.5       | 0.44           | 10.5       | 7.4       | -0.05          | 8.9        | 4.4       | 0.85           | 5.5        |
| SU012_LAU    | SU010_ZUE    | 5.7             | 0.60           | 6.9        | 4.3       | 0.66           | 5.1        | 5.6       | 0.44           | 6.5        | 6.6       | 0.67           | 8.1        | 4.3       | 0.66           | 5.1        | 4.9       | 0.83           | 5.8        |
|              | SU009_HAE    | 6.8             | 0.41           | 8.7        | 7.2       | 0.40           | 8.7        | 5.8       | 0.62           | 7.0        | 8.4       | 0.63           | 11.2       | 7.2       | 0.40           | 8.7        | 4.8       | 0.86           | 6.9        |
|              | SU010_HAE    | 5.7             | 0.60           | 6.9        | 7.0       | 0.34           | 8.9        | 6.1       | 0.55           | 7.3        | 6.7       | 0.74           | 8.8        | 7.0       | 0.34           | 8.9        | 5.1       | 0.85           | 6.9        |
|              | SU011_HAE    | 6.0             | 0.56           | 7.5        | 7.8       | 0.31           | 9.4        | 4.6       | 0.76           | 5.6        | 7.0       | 0.76           | 9.0        | 7.8       | 0.31           | 9.4        | 4.3       | 0.88           | 6.3        |
| SU009_ZUE    | 5.9          | 0.32            | 7.1            | 7.4        | -0.05     | 8.9            | 5.2        | 0.50      | 6.2            | 8.5        | 0.44      | 10.5           | 7.4        | -0.05     | 8.9            | 4.4        | 0.85      | 5.5            |            |
| SU010_ZUE    | 5.7          | 0.60            | 6.9            | 4.3        | 0.66      | 5.1            | 5.6        | 0.44      | 6.5            | 6.6        | 0.67      | 8.1            | 4.3        | 0.66      | 5.1            | 4.9        | 0.83      | 5.8            |            |

**Table S3.** Results of NO<sub>2</sub> and NO global models performance, for Case A (1 h measurements).

| Training set | Testing set  | NO <sub>2</sub> |                |            |           |                |            | NO        |                |            |           |                |            |           |                |            |           |                |            |           |                |            |  |
|--------------|--------------|-----------------|----------------|------------|-----------|----------------|------------|-----------|----------------|------------|-----------|----------------|------------|-----------|----------------|------------|-----------|----------------|------------|-----------|----------------|------------|--|
|              |              | MLR             |                |            | SVR       |                |            | RF        |                |            | MLR       |                |            | SVR       |                |            | RF        |                |            |           |                |            |  |
| Primary SU   | Secondary SU | MAE (ppb)       | R <sup>2</sup> | RMSE (ppb) | MAE (ppb) | R <sup>2</sup> | RMSE (ppb) | MAE (ppb) | R <sup>2</sup> | RMSE (ppb) | MAE (ppb) | R <sup>2</sup> | RMSE (ppb) | MAE (ppb) | R <sup>2</sup> | RMSE (ppb) | MAE (ppb) | R <sup>2</sup> | RMSE (ppb) | MAE (ppb) | R <sup>2</sup> | RMSE (ppb) |  |
| SU009_HAE    | SU010_HAE    | 4.8             | 0.69           | 6.0        | 3.3       | 0.83           | 4.5        | 3.0       | 0.86           | 4.0        | 8.0       | 0.68           | 9.7        | 3.1       | 0.93           | 4.5        | 3.3       | 0.91           | 5.1        |           |                |            |  |
|              | SU011_HAE    | 16.6            | -2.75          | 21.7       | 2.7       | 0.88           | 3.8        | 2.3       | 0.91           | 3.3        | 9.0       | 0.62           | 11.1       | 2.4       | 0.97           | 3.3        | 1.8       | 0.98           | 2.9        |           |                |            |  |
|              | SU012_HAE    | 5.1             | 0.57           | 7.3        | 2.2       | 0.93           | 3.0        | 2.2       | 0.93           | 3.1        | 14.7      | 0.05           | 17.7       | 2.4       | 0.97           | 3.4        | 2.2       | 0.96           | 3.5        |           |                |            |  |
| SU010_HAE    | SU009_HAE    | 4.5             | 0.65           | 6.6        | 3.3       | 0.81           | 4.9        | 3.8       | 0.78           | 5.2        | 7.3       | 0.70           | 9.9        | 3.1       | 0.94           | 4.6        | 3.3       | 0.94           | 4.5        |           |                |            |  |
|              | SU011_HAE    | 9.6             | -0.35          | 13.0       | 2.7       | 0.90           | 3.6        | 3.0       | 0.86           | 4.2        | 5.3       | 0.85           | 7.1        | 2.9       | 0.95           | 4.2        | 2.9       | 0.95           | 4.0        |           |                |            |  |
|              | SU012_HAE    | 4.1             | 0.70           | 6.1        | 2.8       | 0.87           | 4.0        | 3.1       | 0.85           | 4.3        | 9.8       | 0.56           | 12.1       | 2.7       | 0.95           | 4.0        | 2.5       | 0.96           | 3.6        |           |                |            |  |
| SU011_HAE    | SU009_HAE    | 8.1             | 0.21           | 10.0       | 2.9       | 0.87           | 4.1        | 2.6       | 0.88           | 3.8        | 6.4       | 0.74           | 9.2        | 2.1       | 0.97           | 3.0        | 1.9       | 0.97           | 3.0        |           |                |            |  |
|              | SU010_HAE    | 8.8             | 0.00           | 10.7       | 3.6       | 0.64           | 6.5        | 3.3       | 0.79           | 4.9        | 5.8       | 0.82           | 7.3        | 3.0       | 0.93           | 4.5        | 3.9       | 0.88           | 6.0        |           |                |            |  |
|              | SU012_HAE    | 7.5             | 0.32           | 9.3        | 2.7       | 0.86           | 4.2        | 2.2       | 0.91           | 3.3        | 6.8       | 0.80           | 8.2        | 2.2       | 0.97           | 3.1        | 2.4       | 0.95           | 3.9        |           |                |            |  |
| SU012_HAE    | SU009_HAE    | 4.8             | 0.67           | 6.5        | 3.2       | 0.86           | 4.1        | 2.4       | 0.90           | 3.5        | 11.0      | 0.34           | 14.7       | 3.6       | 0.94           | 4.6        | 2.3       | 0.97           | 3.4        |           |                |            |  |
|              | SU010_HAE    | 4.6             | 0.72           | 5.7        | 3.5       | 0.72           | 5.7        | 3.0       | 0.86           | 4.1        | 6.7       | 0.72           | 9.1        | 3.2       | 0.93           | 4.6        | 2.3       | 0.97           | 3.4        |           |                |            |  |
|              | SU011_HAE    | 7.6             | 0.11           | 10.6       | 3.8       | 0.83           | 4.6        | 2.1       | 0.94           | 2.8        | 6.2       | 0.81           | 8.0        | 4.4       | 0.91           | 5.4        | 2.1       | 0.97           | 3.1        |           |                |            |  |
| SU009_ZUE    | SU010_ZUE    | 3.3             | 0.77           | 4.1        | 2.8       | 0.84           | 3.5        | 3.1       | 0.79           | 4.0        | 5.7       | 0.77           | 6.7        | 1.8       | 0.96           | 2.7        | 1.9       | 0.95           | 3.2        |           |                |            |  |
| SU010_ZUE    | SU009_ZUE    | 4.1             | 0.65           | 5.1        | 3.7       | 0.73           | 4.5        | 3.5       | 0.74           | 4.4        | 4.2       | 0.80           | 6.2        | 1.6       | 0.96           | 2.7        | 1.2       | 0.98           | 2.1        |           |                |            |  |
| SU011_LAU    | SU012_LAU    | 7.3             | 0.22           | 9.1        | 3.0       | 0.86           | 3.8        | 2.1       | 0.92           | 2.9        | 6.1       | 0.73           | 7.3        | 2.9       | 0.92           | 4.1        | 1.7       | 0.96           | 2.9        |           |                |            |  |
| SU012_LAU    | SU011_LAU    | 3.9             | 0.71           | 5.5        | 5.7       | 0.57           | 6.7        | 2.3       | 0.91           | 3.0        | 4.6       | 0.78           | 6.7        | 4.7       | 0.82           | 6.0        | 2.2       | 0.95           | 3.2        |           |                |            |  |

**Table S4.** Results of NO<sub>2</sub> and NO global models performance, for Case B (1 h measurements).

| Training set | Testing set  | NO <sub>2</sub> |                |            |           |                |            | NO        |                |            |           |                |            |           |                |            |           |                |            |           |                |            |  |
|--------------|--------------|-----------------|----------------|------------|-----------|----------------|------------|-----------|----------------|------------|-----------|----------------|------------|-----------|----------------|------------|-----------|----------------|------------|-----------|----------------|------------|--|
|              |              | MLR             |                |            | SVR       |                |            | RF        |                |            | MLR       |                |            | SVR       |                |            | RF        |                |            |           |                |            |  |
| Primary SU   | Secondary SU | MAE (ppb)       | R <sup>2</sup> | RMSE (ppb) | MAE (ppb) | R <sup>2</sup> | RMSE (ppb) | MAE (ppb) | R <sup>2</sup> | RMSE (ppb) | MAE (ppb) | R <sup>2</sup> | RMSE (ppb) | MAE (ppb) | R <sup>2</sup> | RMSE (ppb) | MAE (ppb) | R <sup>2</sup> | RMSE (ppb) | MAE (ppb) | R <sup>2</sup> | RMSE (ppb) |  |
| SU009_HAE    | SU010_ZUE    | 6.1             | 0.19           | 7.8        | 5.0       | 0.37           | 6.8        | 5.0       | 0.35           | 7.0        | 7.9       | 0.49           | 9.9        | 4.8       | 0.69           | 7.8        | 4.9       | 0.63           | 8.5        |           |                |            |  |
|              | SU011_LAU    | 14.9            | -2.84          | 20.1       | 6.7       | 0.31           | 8.5        | 5.3       | 0.59           | 6.6        | 8.1       | 0.42           | 10.8       | 4.8       | 0.79           | 6.5        | 4.0       | 0.83           | 5.8        |           |                |            |  |
|              | SU012_LAU    | 6.6             | 0.11           | 9.7        | 6.8       | 0.34           | 8.3        | 5.5       | 0.57           | 6.7        | 17.3      | -1.39          | 21.8       | 4.8       | 0.78           | 6.6        | 4.0       | 0.82           | 5.9        |           |                |            |  |
| SU010_HAE    | SU009_ZUE    | 4.5             | 0.53           | 5.9        | 4.3       | 0.61           | 5.4        | 4.1       | 0.63           | 5.3        | 10.4      | -0.25          | 15.6       | 3.4       | 0.83           | 5.8        | 4.1       | 0.77           | 6.6        |           |                |            |  |
|              | SU011_LAU    | 8.3             | -0.36          | 11.9       | 5.5       | 0.58           | 6.6        | 4.2       | 0.73           | 5.3        | 6.5       | 0.59           | 9.1        | 3.7       | 0.86           | 5.3        | 3.5       | 0.87           | 5.1        |           |                |            |  |
|              | SU012_LAU    | 4.9             | 0.57           | 6.7        | 5.8       | 0.56           | 6.8        | 4.6       | 0.69           | 5.6        | 13.5      | -0.55          | 17.6       | 4.4       | 0.81           | 6.2        | 3.6       | 0.87           | 5.2        |           |                |            |  |
| SU011_HAE    | SU009_ZUE    | 9.8             | -0.82          | 11.6       | 3.5       | 0.73           | 4.5        | 3.8       | 0.65           | 5.1        | 8.8       | 0.07           | 13.5       | 3.5       | 0.80           | 6.3        | 3.9       | 0.73           | 7.3        |           |                |            |  |
|              | SU010_ZUE    | 10.4            | -1.14          | 12.6       | 3.1       | 0.78           | 4.1        | 3.8       | 0.65           | 5.1        | 6.5       | 0.49           | 10.0       | 3.7       | 0.80           | 6.3        | 4.8       | 0.62           | 8.7        |           |                |            |  |
|              | SU012_LAU    | 8.4             | -0.07          | 10.6       | 5.6       | 0.57           | 6.7        | 4.5       | 0.70           | 5.6        | 10.0      | 0.21           | 12.6       | 3.8       | 0.86           | 5.4        | 3.7       | 0.84           | 5.6        |           |                |            |  |
| SU012_HAE    | SU009_ZUE    | 5.5             | 0.35           | 7.0        | 5.1       | 0.43           | 6.5        | 4.3       | 0.53           | 5.9        | 13.2      | 0.02           | 18.3       | 4.3       | 0.78           | 6.6        | 3.5       | 0.75           | 6.9        |           |                |            |  |
|              | SU010_ZUE    | 5.8             | 0.32           | 7.1        | 3.8       | 0.60           | 5.4        | 4.4       | 0.43           | 6.5        | 8.5       | 0.22           | 12.4       | 4.1       | 0.77           | 6.7        | 4.0       | 0.74           | 7.1        |           |                |            |  |
|              | SU011_LAU    | 6.9             | 0.04           | 10.0       | 7.5       | 0.24           | 8.9        | 4.9       | 0.65           | 6.0        | 6.1       | 0.53           | 9.7        | 5.9       | 0.74           | 7.2        | 3.7       | 0.86           | 5.3        |           |                |            |  |
| SU009_ZUE    | SU011_LAU    | 13.6            | -2.15          | 18.2       | 4.6       | 0.70           | 5.6        | 4.1       | 0.75           | 5.1        | 8.8       | 0.41           | 10.9       | 4.7       | 0.83           | 5.8        | 4.5       | 0.81           | 6.1        |           |                |            |  |
|              | SU012_LAU    | 7.5             | -0.09          | 10.7       | 4.3       | 0.73           | 5.3        | 4.2       | 0.74           | 5.2        | 15.7      | -0.86          | 19.3       | 4.4       | 0.85           | 5.5        | 4.7       | 0.81           | 6.2        |           |                |            |  |
| SU010_ZUE    | SU011_LAU    | 10.5            | -0.99          | 14.4       | 4.4       | 0.73           | 5.3        | 4.5       | 0.70           | 5.6        | 5.8       | 0.72           | 7.4        | 5.1       | 0.80           | 6.4        | 4.6       | 0.81           | 6.2        |           |                |            |  |
|              | SU012_LAU    | 6.5             | 0.20           | 9.2        | 4.5       | 0.72           | 5.4        | 4.5       | 0.71           | 5.5        | 10.1      | 0.23           | 12.4       | 4.6       | 0.83           | 5.8        | 4.3       | 0.84           | 5.7        |           |                |            |  |
| SU011_LAU    | SU009_ZUE    | 6.5             | 0.20           | 9.2        | 5.1       | 0.51           | 6.1        | 5.3       | 0.46           | 6.4        | 6.2       | 0.69           | 7.7        | 4.9       | 0.83           | 5.8        | 4.8       | 0.83           | 5.7        |           |                |            |  |
|              | SU010_ZUE    | 10.4            | -1.34          | 13.2       | 5.5       | 0.48           | 6.2        | 5.3       | 0.49           | 6.2        | 5.5       | 0.75           | 7.0        | 5.3       | 0.78           | 6.6        | 4.5       | 0.83           | 5.8        |           |                |            |  |
| SU012_LAU    | SU009_ZUE    | 5.8             | 0.32           | 7.1        | 6.3       | 0.25           | 7.5        | 5.1       | 0.50           | 6.1        | 8.4       | 0.43           | 10.5       | 4.8       | 0.73           | 7.3        | 4.2       | 0.85           | 5.5        |           |                |            |  |
|              | SU010_ZUE    | 4.8             | 0.53           | 5.9        | 4.4       | 0.66           | 5.0        | 5.5       | 0.44           | 6.5        | 6.5       | 0.67           | 8.0        | 5.0       | 0.82           | 5.9        | 4.7       | 0.83           | 5.7        |           |                |            |  |

**Table S5.** Results of NO<sub>2</sub> and NO global models performance, for Case A after including O<sub>3</sub> (1 h measurements).

| Training set | Testing set  | NO <sub>2</sub> |                |            |           |                |            | NO        |                |            |           |                |            |           |                |            |           |                |            |           |                |            |  |
|--------------|--------------|-----------------|----------------|------------|-----------|----------------|------------|-----------|----------------|------------|-----------|----------------|------------|-----------|----------------|------------|-----------|----------------|------------|-----------|----------------|------------|--|
|              |              | MLR             |                |            | SVR       |                |            | RF        |                |            | MLR       |                |            | SVR       |                |            | RF        |                |            |           |                |            |  |
| Primary SU   | Secondary SU | MAE (ppb)       | R <sup>2</sup> | RMSE (ppb) | MAE (ppb) | R <sup>2</sup> | RMSE (ppb) | MAE (ppb) | R <sup>2</sup> | RMSE (ppb) | MAE (ppb) | R <sup>2</sup> | RMSE (ppb) | MAE (ppb) | R <sup>2</sup> | RMSE (ppb) | MAE (ppb) | R <sup>2</sup> | RMSE (ppb) | MAE (ppb) | R <sup>2</sup> | RMSE (ppb) |  |
| SU009_HAE    | SU010_HAE    | 4.5             | 0.73           | 5.6        | 2.8       | 0.86           | 4.0        | 2.9       | 0.87           | 3.9        | 7.7       | 0.71           | 9.3        | 2.5       | 0.95           | 3.7        | 2.8       | 0.94           | 4.1        |           |                |            |  |
|              | SU011_HAE    | 16.1            | -2.51          | 21.0       | 2.5       | 0.91           | 3.4        | 2.0       | 0.94           | 2.8        | 8.8       | 0.64           | 10.8       | 1.7       | 0.98           | 2.7        | 1.6       | 0.98           | 2.5        |           |                |            |  |
|              | SU012_HAE    | 4.7             | 0.61           | 7.0        | 2.2       | 0.93           | 3.0        | 2.0       | 0.94           | 2.8        | 14.4      | 0.09           | 17.3       | 1.9       | 0.98           | 2.8        | 1.9       | 0.97           | 2.9        |           |                |            |  |
| SU010_HAE    | SU009_HAE    | 4.1             | 0.71           | 6.1        | 3.5       | 0.80           | 5.0        | 3.7       | 0.79           | 5.1        | 7.1       | 0.72           | 9.6        | 2.4       | 0.96           | 3.5        | 2.8       | 0.96           | 3.7        |           |                |            |  |
|              | SU011_HAE    | 9.0             | -0.19          | 12.2       | 2.7       | 0.89           | 3.7        | 3.0       | 0.86           | 4.2        | 5.4       | 0.85           | 7.1        | 2.4       | 0.96           | 3.6        | 2.6       | 0.96           | 3.6        |           |                |            |  |
|              | SU012_HAE    | 3.7             | 0.74           | 5.7        | 2.8       | 0.87           | 4.0        | 3.0       | 0.86           | 4.2        | 9.9       | 0.54           | 12.2       | 1.9       | 0.97           | 3.1        | 2.1       | 0.97           | 3.1        |           |                |            |  |
| SU011_HAE    | SU009_HAE    | 8.2             | 0.21           | 10.0       | 2.6       | 0.89           | 3.7        | 2.4       | 0.90           | 3.5        | 6.3       | 0.75           | 9.0        | 1.8       | 0.98           | 2.7        | 1.7       | 0.98           | 2.6        |           |                |            |  |
|              | SU010_HAE    | 8.7             | 0.01           | 10.7       | 3.7       | 0.67           | 6.1        | 3.4       | 0.81           | 4.7        | 5.7       | 0.82           | 7.2        | 3.1       | 0.94           | 4.4        | 3.4       | 0.94           | 5.0        |           |                |            |  |
|              | SU012_HAE    | 7.6             | 0.31           | 9.3        | 2.3       | 0.89           | 3.7        | 2.0       | 0.93           | 3.0        | 6.7       | 0.80           | 8.1        | 2.4       | 0.97           | 3.3        | 2.0       | 0.97           | 3.2        |           |                |            |  |
| SU012_HAE    | SU009_HAE    | 4.5             | 0.72           | 5.9        | 2.3       | 0.91           | 3.4        | 2.1       | 0.92           | 3.2        | 10.9      | 0.37           | 14.4       | 1.9       | 0.97           | 3.1        | 1.9       | 0.97           | 2.9        |           |                |            |  |
|              | SU010_HAE    | 4.4             | 0.74           | 5.5        | 3.4       | 0.75           | 5.4        | 3.0       | 0.86           | 4.0        | 6.8       | 0.72           | 9.1        | 2.7       | 0.95           | 3.7        | 2.3       | 0.96           | 3.4        |           |                |            |  |
|              | SU011_HAE    | 7.5             | 0.15           | 10.3       | 2.4       | 0.93           | 3.0        | 1.8       | 0.95           | 2.5        | 6.2       | 0.81           | 7.9        | 2.4       | 0.97           | 3.1        | 1.7       | 0.98           | 2.6        |           |                |            |  |
| SU009_ZUE    | SU010_ZUE    | 2.5             | 0.87           | 3.1        | 2.1       | 0.91           | 2.6        | 1.7       | 0.93           | 2.3        | 5.6       | 0.78           | 6.6        | 1.2       | 0.98           | 1.9        | 1.4       | 0.97           | 2.4        |           |                |            |  |
| SU010_ZUE    | SU009_ZUE    | 2.4             | 0.86           | 3.2        | 2.5       | 0.87           | 3.1        | 2.4       | 0.88           | 3.0        | 6.1       | 0.72           | 7.5        | 1.0       | 0.99           | 1.7        | 0.9       | 0.99           | 1.6        |           |                |            |  |
| SU011_LAU    | SU012_LAU    | 6.3             | 0.39           | 8.0        | 1.8       | 0.94           | 2.5        | 1.4       | 0.96           | 2.0        | 6.3       | 0.78           | 8.6        | 2.7       | 0.92           | 3.9        | 1.6       | 0.96           | 2.6        |           |                |            |  |
| SU012_LAU    | SU011_LAU    | 2.8             | 0.81           | 4.4        | 1.6       | 0.94           | 2.4        | 2.2       | 0.92           | 2.9        | 4.7       | 0.76           | 6.8        | 3.4       | 0.89           | 4.5        | 2.0       | 0.96           | 2.9        |           |                |            |  |

**Table S6.** Results of NO<sub>2</sub> and NO global models performance, for Case B after including O<sub>3</sub> (1 h measurements).

| Training set | Testing set  | NO <sub>2</sub> |                |            |           |                |            | NO        |                |            |           |                |            |           |                |            |           |                |            |           |                |            |  |
|--------------|--------------|-----------------|----------------|------------|-----------|----------------|------------|-----------|----------------|------------|-----------|----------------|------------|-----------|----------------|------------|-----------|----------------|------------|-----------|----------------|------------|--|
|              |              | MLR             |                |            | SVR       |                |            | RF        |                |            | MLR       |                |            | SVR       |                |            | RF        |                |            |           |                |            |  |
| Primary SU   | Secondary SU | MAE (ppb)       | R <sup>2</sup> | RMSE (ppb) | MAE (ppb) | R <sup>2</sup> | RMSE (ppb) | MAE (ppb) | R <sup>2</sup> | RMSE (ppb) | MAE (ppb) | R <sup>2</sup> | RMSE (ppb) | MAE (ppb) | R <sup>2</sup> | RMSE (ppb) | MAE (ppb) | R <sup>2</sup> | RMSE (ppb) | MAE (ppb) | R <sup>2</sup> | RMSE (ppb) |  |
| SU009_HAE    | SU010_ZUE    | 5.8             | 0.32           | 7.2        | 4.6       | 0.52           | 6.0        | 4.4       | 0.52           | 6.0        | 7.8       | 0.52           | 9.8        | 4.0       | 0.80           | 6.4        | 4.2       | 0.75           | 7.0        |           |                |            |  |
|              | SU011_LAU    | 14.8            | -2.80          | 19.9       | 5.7       | 0.53           | 7.0        | 4.7       | 0.68           | 5.8        | 7.6       | 0.46           | 10.2       | 3.8       | 0.86           | 5.2        | 3.6       | 0.85           | 5.4        |           |                |            |  |
|              | SU012_LAU    | 7.0             | -0.07          | 10.6       | 6.0       | 0.53           | 7.0        | 4.8       | 0.67           | 5.9        | 16.5      | -1.30          | 20.9       | 3.9       | 0.83           | 5.6        | 3.6       | 0.85           | 5.4        |           |                |            |  |
| SU010_HAE    | SU009_ZUE    | 3.8             | 0.67           | 4.9        | 4.4       | 0.59           | 5.5        | 4.1       | 0.64           | 5.2        | 10.2      | -0.18          | 15.3       | 4.0       | 0.79           | 6.4        | 3.6       | 0.86           | 5.2        |           |                |            |  |
|              | SU011_LAU    | 7.7             | -0.25          | 11.4       | 5.6       | 0.57           | 6.7        | 4.3       | 0.73           | 5.3        | 6.3       | 0.61           | 8.6        | 4.0       | 0.83           | 5.8        | 3.5       | 0.86           | 5.2        |           |                |            |  |
|              | SU012_LAU    | 4.7             | 0.57           | 6.7        | 5.6       | 0.58           | 6.7        | 4.6       | 0.69           | 5.7        | 13.2      | -0.57          | 17.3       | 4.3       | 0.80           | 6.1        | 3.7       | 0.86           | 5.2        |           |                |            |  |
| SU011_HAE    | SU009_ZUE    | 9.8             | -0.80          | 11.6       | 2.8       | 0.80           | 3.9        | 3.3       | 0.70           | 4.7        | 8.7       | 0.12           | 13.2       | 3.8       | 0.82           | 5.9        | 3.5       | 0.80           | 6.2        |           |                |            |  |
|              | SU010_ZUE    | 10.6            | -1.15          | 12.7       | 2.8       | 0.82           | 3.7        | 3.5       | 0.69           | 4.8        | 6.6       | 0.50           | 9.9        | 4.1       | 0.81           | 6.1        | 4.3       | 0.73           | 7.3        |           |                |            |  |
|              | SU012_LAU    | 8.1             | 0.01           | 10.2       | 4.5       | 0.73           | 5.3        | 4.0       | 0.76           | 5.0        | 9.7       | 0.21           | 12.3       | 3.4       | 0.86           | 5.2        | 3.3       | 0.87           | 5.1        |           |                |            |  |
| SU012_HAE    | SU009_ZUE    | 4.9             | 0.51           | 6.1        | 3.9       | 0.64           | 5.2        | 3.7       | 0.63           | 5.3        | 12.9      | -0.61          | 17.9       | 3.5       | 0.83           | 5.8        | 3.0       | 0.84           | 5.6        |           |                |            |  |
|              | SU010_ZUE    | 5.6             | 0.39           | 6.8        | 3.9       | 0.60           | 5.5        | 4.1       | 0.53           | 6.0        | 8.6       | 0.24           | 12.3       | 3.7       | 0.83           | 5.8        | 3.4       | 0.84           | 5.7        |           |                |            |  |
|              | SU011_LAU    | 6.6             | 0.07           | 9.8        | 6.0       | 0.53           | 7.0        | 4.3       | 0.73           | 5.3        | 6.4       | 0.52           | 9.6        | 4.0       | 0.85           | 5.3        | 3.4       | 0.87           | 5.0        |           |                |            |  |
| SU009_ZUE    | SU011_LAU    | 14.6            | -2.65          | 19.5       | 4.2       | 0.75           | 5.1        | 4.5       | 0.70           | 5.6        | 5.6       | 0.78           | 6.6        | 5.1       | 0.78           | 6.4        | 5.0       | 0.76           | 6.8        |           |                |            |  |
|              | SU012_LAU    | 9.0             | -0.64          | 13.1       | 3.8       | 0.79           | 4.7        | 4.6       | 0.71           | 5.5        | 15.8      | -1.00          | 19.5       | 4.6       | 0.81           | 6.0        | 4.9       | 0.77           | 6.6        |           |                |            |  |
| SU010_ZUE    | SU011_LAU    | 11.4            | -1.33          | 15.6       | 4.3       | 0.75           | 5.1        | 4.6       | 0.67           | 5.9        | 5.6       | 0.73           | 7.2        | 5.2       | 0.77           | 6.7        | 5.0       | 0.75           | 6.9        |           |                |            |  |
|              | SU012_LAU    | 7.4             | -0.16          | 11.0       | 4.3       | 0.75           | 5.1        | 4.6       | 0.68           | 5.7        | 10.1      | 0.18           | 12.5       | 4.8       | 0.80           | 6.2        | 4.9       | 0.77           | 6.7        |           |                |            |  |
| SU011_LAU    | SU009_ZUE    | 9.4             | -0.74          | 11.4       | 4.2       | 0.70           | 4.7        | 4.6       | 0.63           | 5.3        | 6.0       | 0.72           | 7.5        | 4.5       | 0.87           | 5.1        | 4.3       | 0.87           | 5.2        |           |                |            |  |
|              | SU010_ZUE    | 9.6             | -0.92          | 12.0       | 5.2       | 0.57           | 5.7        | 5.4       | 0.52           | 6.0        | 5.3       | 0.78           | 6.7        | 4.7       | 0.83           | 5.7        | 4.2       | 0.86           | 5.3        |           |                |            |  |
| SU012_LAU    | SU009_ZUE    | 5.2             | 0.48           | 6.2        | 4.0       | 0.73           | 4.5        | 4.6       | 0.62           | 5.3        | 8.2       | 0.47           | 10.3       | 4.3       | 0.82           | 5.9        | 4.0       | 0.87           | 5.0        |           |                |            |  |
|              | SU010_ZUE    | 4.6             | 0.61           | 5.4        | 4.8       | 0.61           | 5.4        | 5.5       | 0.49           | 6.2        | 6.4       | 0.69           | 7.9        | 4.7       | 0.85           | 5.5        | 4.5       | 0.86           | 5.4        |           |                |            |  |

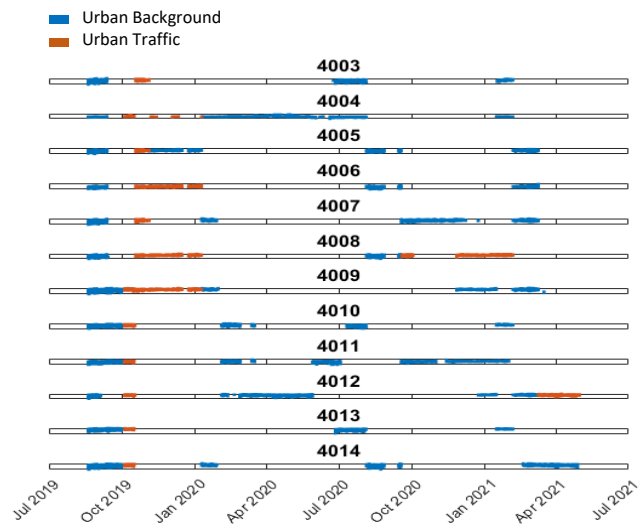

**Figure S1.** Summary of temporal deployment of Modena SUs at both sites.

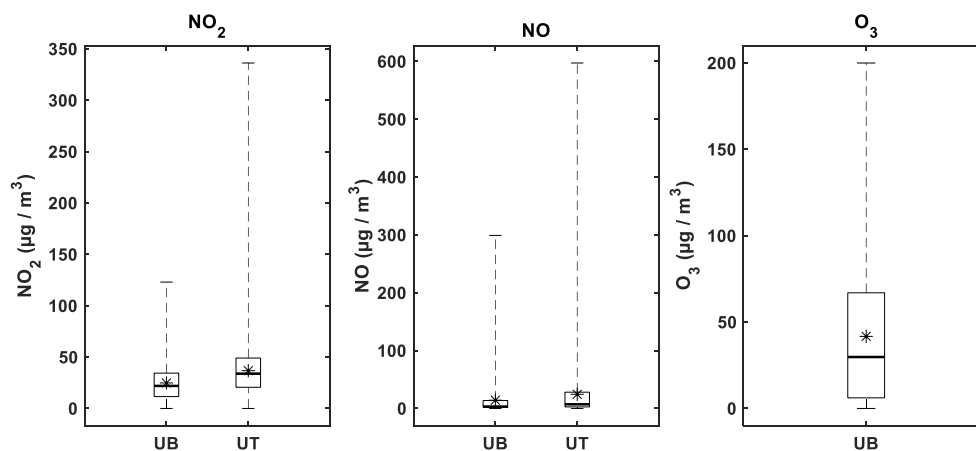

**Figure S2.** Box plots showing pollutants concentrations at UB and UT deployment sites of Modena dataset using 1 h averaged data. The central line indicates the median, the star represents the mean, and the bottom and top edges of the box denote the 25<sup>th</sup> and 75<sup>th</sup> percentiles of the data, respectively. The whiskers extend to the minimum and maximum values.

**Table S7.** Sensor to reference correlation in urban background (UB) site, and in urban traffic (UT) site of Modena dataset.

| SU   | UB    |                 |                | UT   |                 |
|------|-------|-----------------|----------------|------|-----------------|
|      | NO    | NO <sub>2</sub> | O <sub>3</sub> | NO   | NO <sub>2</sub> |
| 4003 | -0.18 | 0.80            | 0.52           | 0.90 | 0.70            |
| 4004 | 0.11  | 0.06            | 0.38           | 0.79 | 0.07            |
| 4005 | 0.16  | 0.74            | 0.19           | 0.90 | 0.77            |
| 4006 | -0.13 | 0.78            | 0.73           | 0.94 | 0.89            |
| 4007 | 0.31  | 0.76            | 0.46           | 0.86 | 0.75            |
| 4008 | -0.20 | 0.68            | 0.77           | 0.94 | 0.85            |
| 4009 | 0.31  | 0.71            | 0.39           | 0.70 | 0.69            |
| 4010 | -0.02 | 0.82            | 0.47           | 0.95 | 0.84            |
| 4011 | 0.14  | 0.71            | 0.28           | 0.94 | 0.83            |
| 4012 | 0.12  | 0.69            | 0.47           | 0.79 | 0.65            |
| 4013 | -0.17 | 0.70            | 0.53           | 0.93 | 0.85            |
| 4014 | 0.22  | 0.72            | 0.64           | 0.95 | 0.83            |

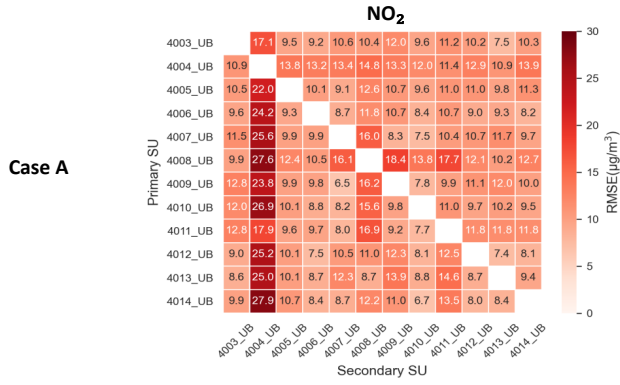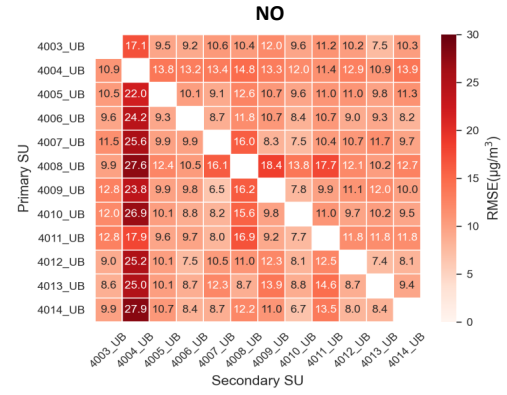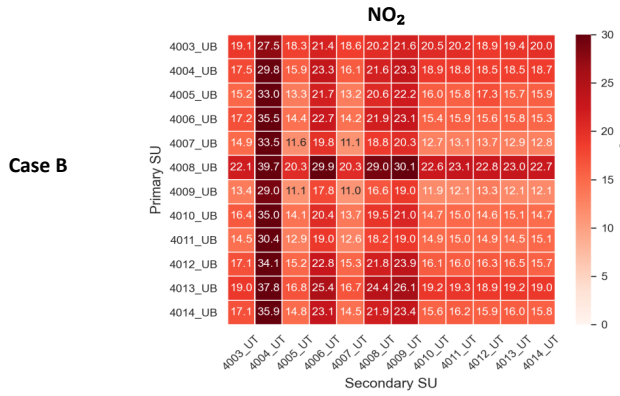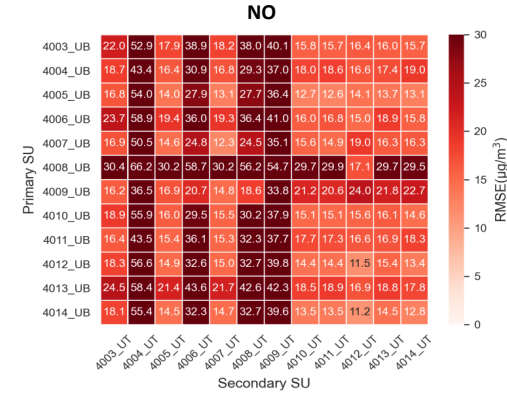

**Figure S3.** RMSE results of global RF models for Case A and Case B using Modena dataset at the urban background (UB) site.

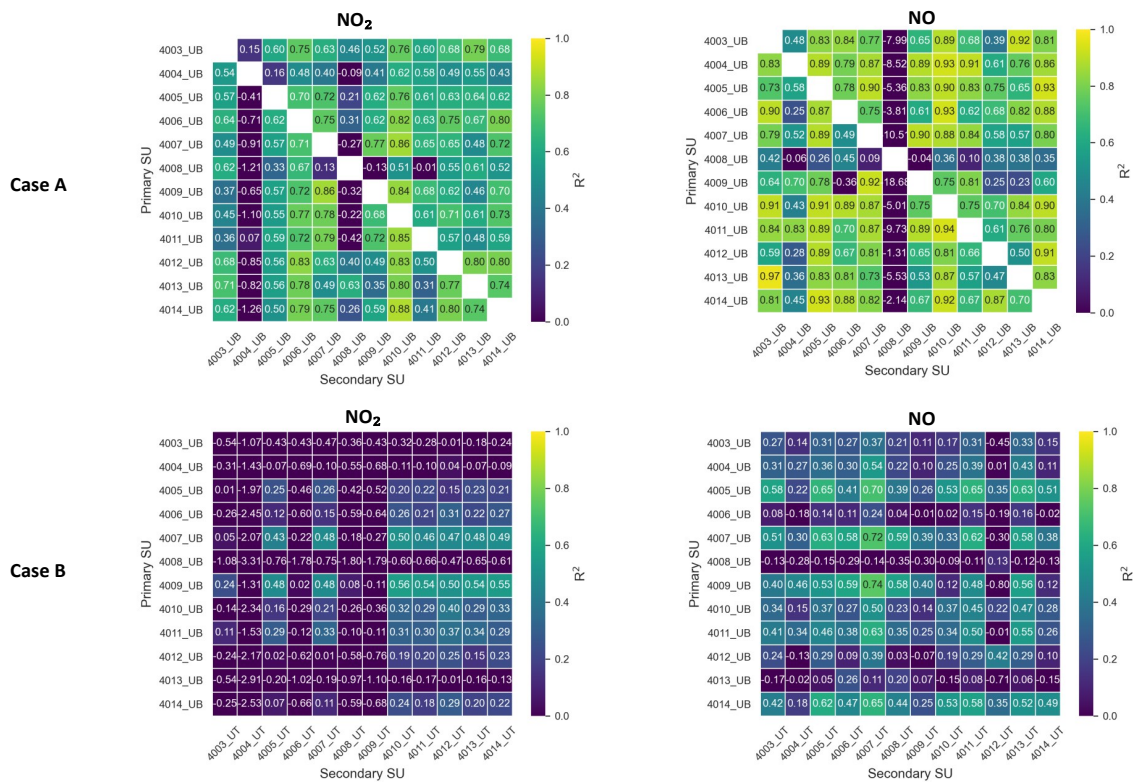

**Figure S4.**  $R^2$  results of global RF models for Case A and Case B using Modena dataset at the urban background (UB) site.



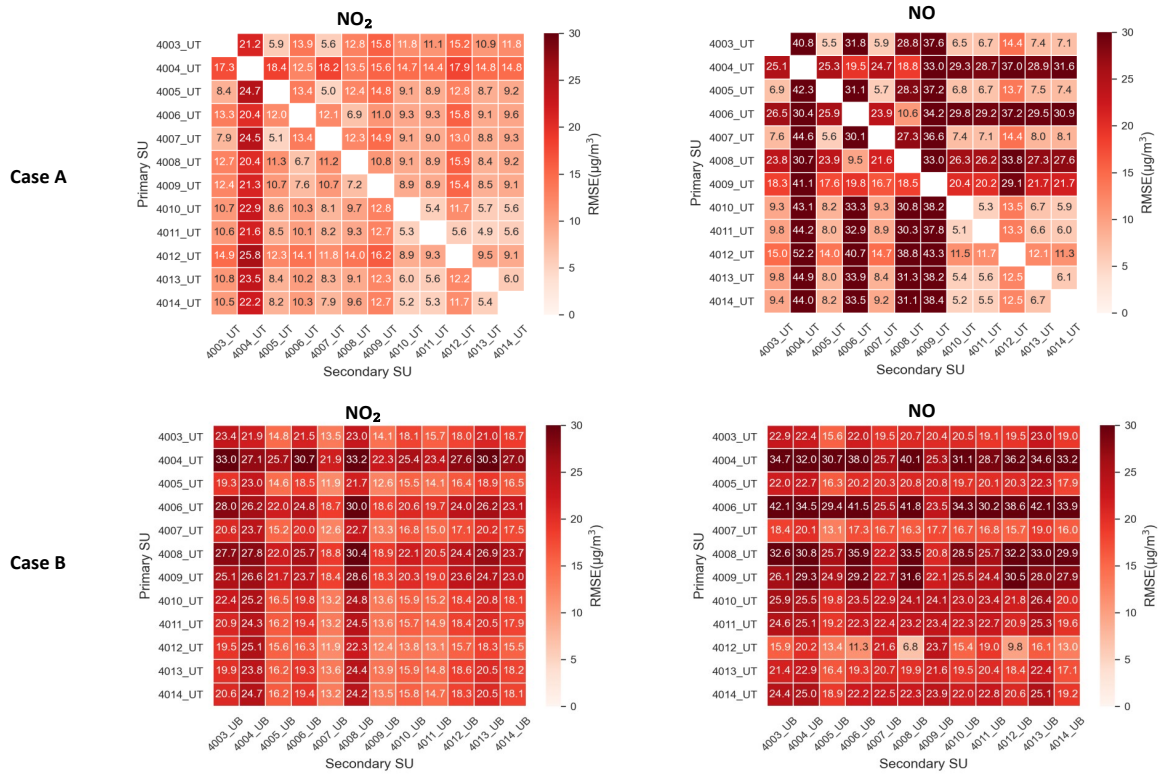

Figure S5. RMSE results of global RF models using Modena dataset at the urban background (UT) site.

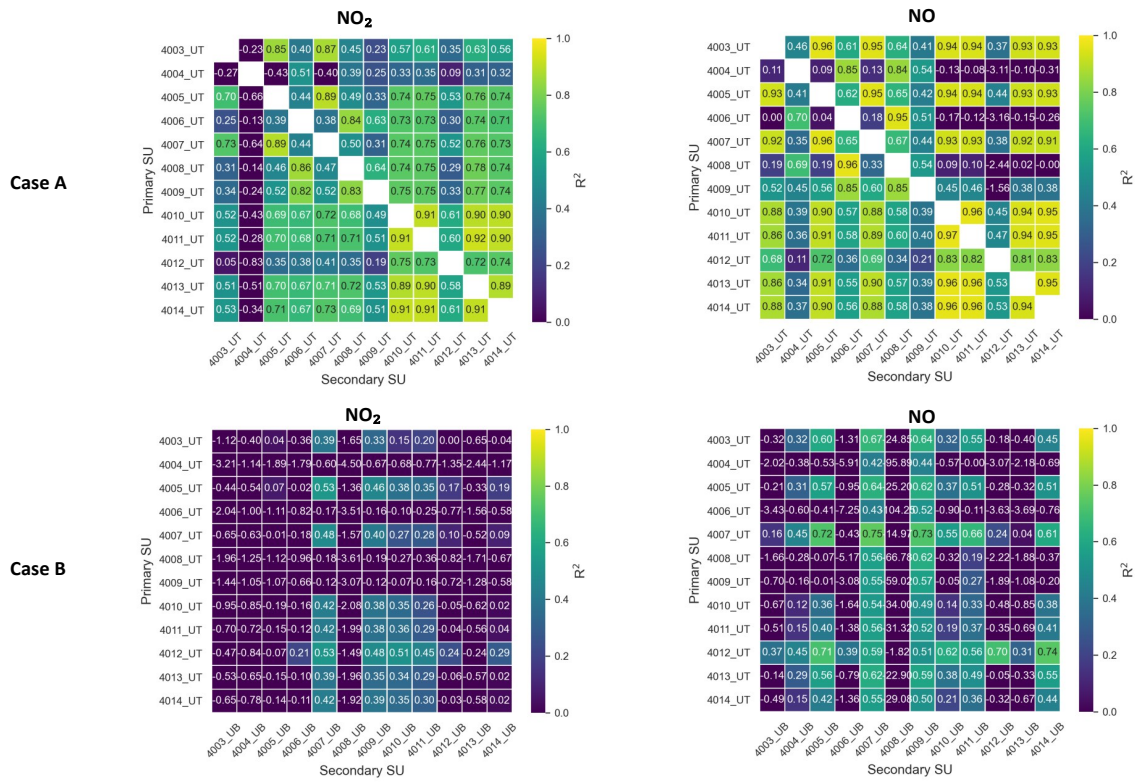

Figure S6.  $R^2$  results of global RF models using Modena dataset at the urban background (UT) site.
